# Supplementary material for: Assembled and isolated Bi5O7I nanowires with good photocatalytic activities
Source: Royal Society of Chemistry journal article supplement (doi:10.1039/c7ce00439g), 2017-01-01
Supplement: c7ce00439g1.pdf [file c7ce00439g1.pdf]

## Assembled and isolated $\text{Bi}_5\text{O}_7\text{I}$ nanowires with good photocatalytic activities

Gongjuan Wu, Yan Zhao\*, Yawen Li, Fengnan Zhang, Jingzhe Zhao\*

College of Chemistry and Chemical Engineering, Hunan University, Changsha 410082, P. R. China

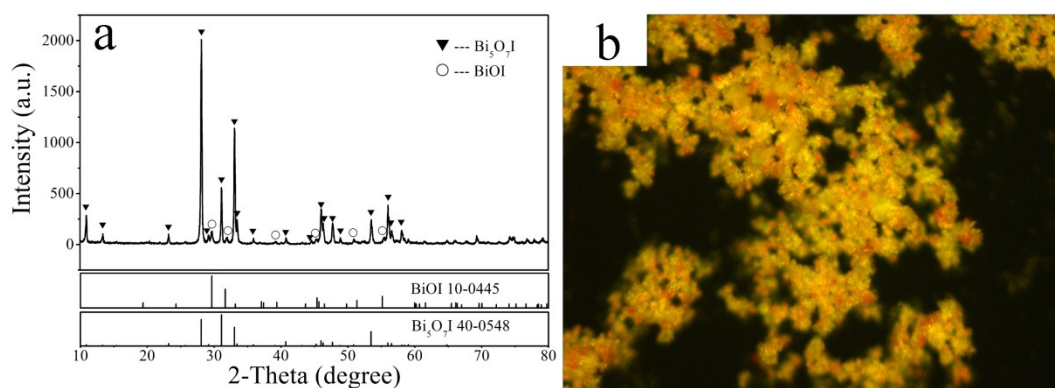

**Figure S1.** XRD pattern and optical microscope image of bismuth based sample with 1.9 g of NaOH introduction.

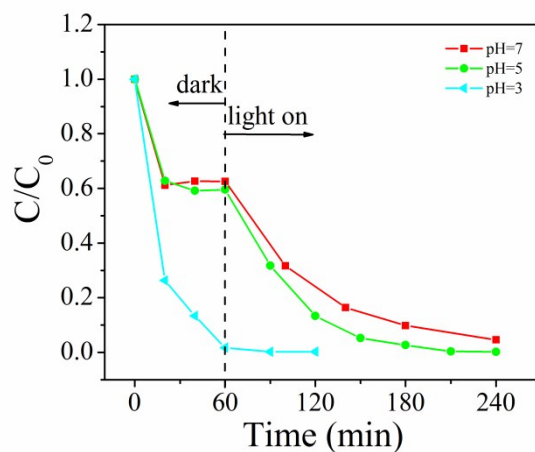

**Figure S2.** Degradation profiles of RhB solution under different pH values with sample S2 as photocatalyst. (a) pH=7; (b) pH=5; (c) pH=3.
